# Supplementary material
Source: PubMed Central journal article supplement (PMC7855760)
Supplement: NIHMS1619364-supplement-1.pdf [file NIHMS1619364-supplement-1.pdf]

Figure S1. Restricted cubic spline plot of adjusted hazard ratios for CKD progression by dietary score.

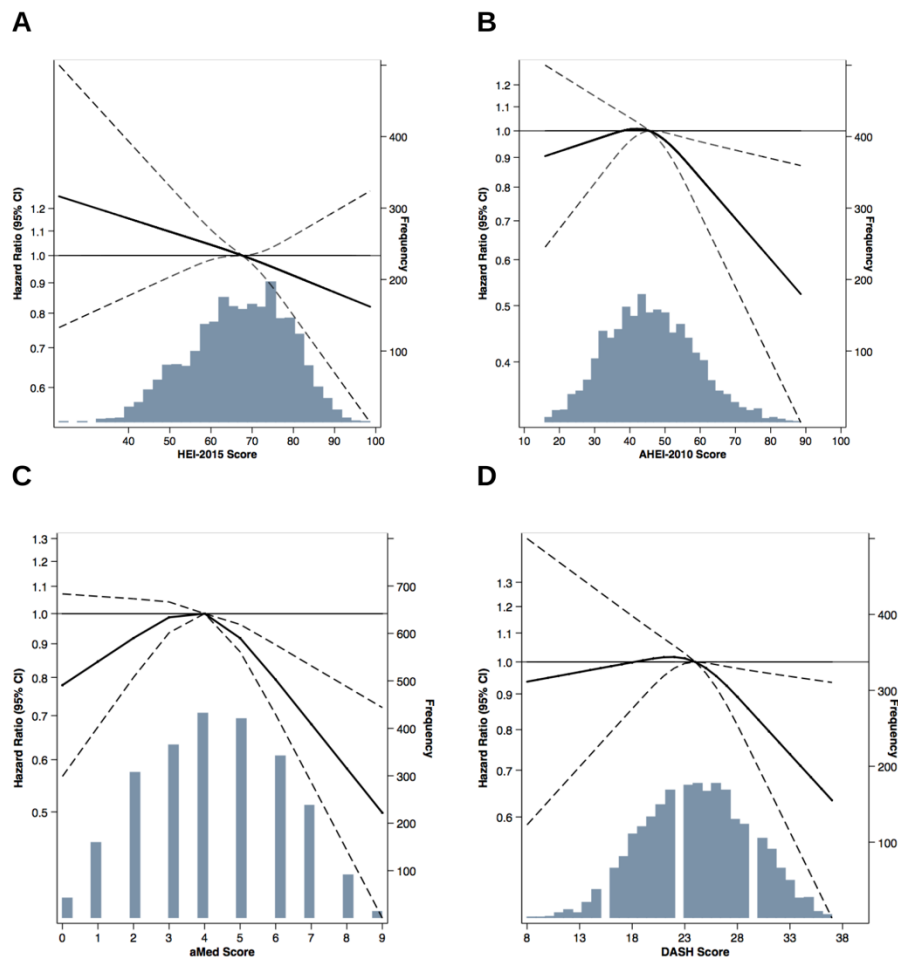

(A) HEI-2015; (B) AHEI-2010; (C) aMed; (D) DASH. Adjusted for total energy intake, clinical site, age, sex, race, education, income level, estimated glomerular filtration rate, urinary protein, smoking status, physical activity, alcohol status (for HEI-2015 and DASH scores), body mass index, diabetes mellitus, hypertension, cardiovascular disease, high-density lipoprotein cholesterol, and angiotensin-converting enzyme inhibitor or angiotensin II receptor blocker use. Histogram displays the distribution of study participants according to scores for each dietary pattern. Solid line represents the adjusted HR (on logarithmic scale) and dashed lines represent the 95% confidence interval. Knots placed at 55, 68, and 79 for HEI-2015; 34, 46, and 58 for AHEI-2010; 2, 4, and 6 for aMed; and 19, 24, and 29 for DASH. AHEI, Alternative Healthy Eating Index; aMed, alternate Mediterranean diet; DASH, Dietary Approaches to Stop Hypertension; HEI, Healthy Eating Index.

Table S1. Baseline characteristics of participants included in the present study and excluded from the present study<sup>a</sup>.

| <b>Characteristics</b>           | <b>Included (n=2,403)</b> | <b>Excluded (n=1,536)</b> |
|----------------------------------|---------------------------|---------------------------|
| Age, years                       | 58 ± 11                   | 58 ± 11                   |
| Female, %                        | 48                        | 41                        |
| Non-white, %                     | 47                        | 76                        |
| ≥College graduate, %             | 39                        | 18                        |
| Income ≥\$50,000, %              | 36                        | 16                        |
| Current smoker, %                | 12                        | 15                        |
| Current drinker, %               | 22                        | 17                        |
| Physical activity, METs/wk       | 203 ± 131                 | 191 ± 166                 |
| BMI, kg/m <sup>2</sup>           | 32 ± 8                    | 32 ± 8                    |
| Diabetes, %                      | 43                        | 57                        |
| Hypertension, %                  | 84                        | 90                        |
| Systolic blood pressure, mmHg    | 126 ± 21                  | 132 ± 23                  |
| Diastolic blood pressure, mmHg   | 70 ± 12                   | 73 ± 14                   |
| History of CVD, %                | 31                        | 37                        |
| eGFR, mL/min/1.73 m <sup>2</sup> | 47 ± 17                   | 42 ± 16                   |
| Urinary protein, g/24 hr         | 0.9 ± 2.1                 | 1.4 ± 2.6                 |
| HDL cholesterol, mg/dL           | 48 ± 16                   | 46 ± 15                   |
| ACEi or ARB use, %               | 67                        | 71                        |
| Total energy intake, kcal/d      | 1,815 ± 793               | 1,932 ± 955               |
| HEI-2015 score (0-100)           | 67 ± 12                   | 64 ± 11                   |
| AHEI-2010 score (0-110)          | 46 ± 12                   | 46 ± 12                   |
| aMed score (0-9)                 | 4 ± 2                     | 4 ± 2                     |
| DASH score (8-40)                | 24 ± 5                    | 24 ± 5                    |

<sup>a</sup> Values for categorical variables are given as percentage; for continuous variables, mean ± standard deviation. ACEi, angiotensin-converting enzyme inhibitor; AHEI, Alternative Healthy Eating Index; aMed, alternate Mediterranean diet; ARB; angiotensin II receptor blocker; BMI, body mass index; BP, blood pressure; CVD, cardiovascular disease; DASH, Dietary Approaches to Stop Hypertension; eGFR, estimated glomerular filtration rate; HDL, high-density lipoprotein; HEI, Healthy Eating Index; kcal, kilocalories; MET, metabolic equivalent task, mmHg, millimeters of mercury.

Table S2. Criteria for scoring HEI-2015, AHEI-2010, aMed, and DASH scores<sup>a</sup>.

| Component                                                    | HEI-2015<br>(0-100 points)               |                                  | AHEI-2010<br>(0-110 points)   |                                               | aMed <sup>b</sup><br>(0-9 points) |                    | DASH<br>(8-40 points) |                        |
|--------------------------------------------------------------|------------------------------------------|----------------------------------|-------------------------------|-----------------------------------------------|-----------------------------------|--------------------|-----------------------|------------------------|
|                                                              | Minimum                                  | Maximum                          | Minimum                       | Maximum                                       | Minimum                           | Maximum            | Minimum               | Maximum                |
| Total vegetables                                             | 0 points<br>0 cups/1000 kcal             | 5 points<br>≥1.1 cups/1000 kcal  | 0 points<br>0 servings/day    | 10 points<br>≥5 servings/day                  | 0 points<br><Median               | 1 point<br>≥Median | 1 point<br>Quintile 1 | 5 points<br>Quintile 5 |
| Greens & beans                                               | 0 points<br>0 cups/1000 kcal             | 5 points<br>≥0.2 cups/1000 kcal  |                               |                                               |                                   |                    |                       |                        |
| Total fruit                                                  | 0 points<br>0 cups/1000 kcal             | 5 points<br>≥0.8 cups/1000 kcal  | 0 points<br>0 servings/day    | 10 points<br>≥4 servings/day                  | 0 points<br><Median               | 1 point<br>≥Median | 1 point<br>Quintile 1 | 5 points<br>Quintile 5 |
| Whole fruit                                                  | 0 points<br>0 cups/1000 kcal             | 5 points<br>≥0.4 cups/1000 kcal  |                               |                                               |                                   |                    |                       |                        |
| Whole grains                                                 | 0 points<br>0 oz <sup>d</sup> /1000 kcal | 10 points<br>≥1.5 oz/1000 kcal   | 0 points<br>0 g/day           | 10 points<br>75g/day (women)<br>90g/day (men) | 0 points<br><Median               | 1 point<br>≥Median | 1 point<br>Quintile 1 | 5 points<br>Quintile 5 |
| Refined grains                                               | 0 points<br>≥4.3 oz/1000 kcal            | 10 points<br>≤1.8 oz/1000 kcal   |                               |                                               |                                   |                    |                       |                        |
| All dairy                                                    | 0 points<br>0 cups/1000 kcal             | 10 points<br>≥1.3 cups/1000 kcal |                               |                                               |                                   |                    |                       |                        |
| Low-fat dairy                                                |                                          |                                  |                               |                                               |                                   |                    | 1 point<br>Quintile 1 | 5 points<br>Quintile 5 |
| Sugar sweetened beverages <sup>e</sup>                       |                                          |                                  | 0 points<br>≥1 servings/day   | 10 points<br>0 servings/day                   |                                   |                    | 1 point<br>Quintile 5 | 5 points<br>Quintile 1 |
| Total protein                                                | 0 points<br>0 oz/1000 kcal               | 5 points<br>≥2.5oz/1000 kcal     |                               |                                               |                                   |                    |                       |                        |
| Nuts & legumes<br>(2 different categories for Mediterranean) |                                          |                                  | 0 points<br>0 servings/day    | 10 points<br>≥1 serving/day                   | 0 points<br><Median               | 1 point<br>≥Median | 1 point<br>Quintile 1 | 5 points<br>Quintile 5 |
| Red/processed meat                                           |                                          |                                  | 0 points<br>≥1.5 servings/day | 10 points<br>0 servings/day                   | 0 points<br>≥Median               | 1 point<br><Median | 1 point<br>Quintile 5 | 5 points<br>Quintile 1 |
| Seafood or plant protein                                     | 0 points<br>0 oz/1000 kcal               | 5 points<br>≥0.8 oz/1000 kcal    |                               |                                               |                                   |                    |                       |                        |
| Fish                                                         |                                          |                                  |                               |                                               | 0 points<br><Median               | 1 point<br>≥Median |                       |                        |
| Trans fat                                                    |                                          |                                  | 0 points<br>≥4% energy        | 10 points<br>≤0.5% energy                     |                                   |                    |                       |                        |
| Long-chain fats                                              |                                          |                                  | 0 points<br>0 mg/day          | 10 points<br>250 mg/day                       |                                   |                    |                       |                        |
| PUFA                                                         |                                          |                                  | 0 points<br>≤2% energy        | 10 points<br>≥10% energy                      |                                   |                    |                       |                        |
| MUFA:SFA                                                     |                                          |                                  |                               |                                               | 0 points<br><Median               | 1 point            |                       |                        |

|                      |                                |                                 |                               |                               |                        | ≥Median        |                       |                        |
|----------------------|--------------------------------|---------------------------------|-------------------------------|-------------------------------|------------------------|----------------|-----------------------|------------------------|
| (MUFA+PUFA)/SFA      | 0 points<br>≤1.2               | 10 points<br>≥2.5               |                               |                               |                        |                |                       |                        |
| Saturated fats       | 0 points<br>≥16%<br>energy     | 10 points<br>≤8%<br>energy      |                               |                               |                        |                |                       |                        |
| Sodium               | 0 points<br>≥2.0g/1000<br>kcal | 10 points<br>≤1.1g/1000<br>kcal | 0 points<br>Highest<br>decile | 10 points<br>Lowest<br>decile |                        |                | 1 point<br>Quintile 5 | 5 points<br>Quintile 1 |
| Alcohol <sup>f</sup> |                                |                                 | 0 points                      | 10 points                     | 0 points               | 1 point        |                       |                        |
| Women                |                                |                                 | ≥2.5<br>drinks/day            | 0.5-1.5<br>drinks/day         | <5 or >15<br>g/day     | 5-15<br>g/day  |                       |                        |
| Men                  |                                |                                 | ≥3.5<br>drinks/day            | 0.5-2.0<br>drinks/day         | <10 or<br>>25<br>g/day | 10-25<br>g/day |                       |                        |
| Added sugars         | 0 points<br>≥26%<br>energy     | 10 points<br>≤6.5%<br>energy    |                               |                               |                        |                |                       |                        |

<sup>a</sup> AHEI-2010, Alternative Healthy Eating Index-2010; aMed, alternate Mediterranean diet score; DASH; Dietary Approaches to Stop Hypertension; HEI-2015, Healthy Eating Index-2015; kcal, kilocalorie; MUFA, monounsaturated fatty acids; oz, ounce; PUFA, polyunsaturated fatty acids; SFA; saturated fatty acids; SSB, sugar-sweetened beverages.

<sup>b</sup> aMed sex-specific median cutoffs for each component for women and men, respectively: vegetables (1.13 & 1.01 servings/d), fruits (0.94 & 0.76 servings/d), whole grains (1.55 & 1.53 servings/d), nuts (0.25 & 0.29 servings/d), legumes (0.09 & 0.08 servings/d), red/processed meat (1.27 & 1.95 servings/d), fish (0.38 & 0.48 servings/d), MUFA:SFA (1.22 & 1.23), alcohol (5-15 g/d & 10-25 g/d)

<sup>c</sup> 1 cup = 236.6 mL.

<sup>d</sup> 1 ounce = 28.3 g.

<sup>e</sup> For AHEI-2010, sugar-sweetened beverages in addition to fruit juice.

<sup>f</sup> For AHEI-2010, non-drinkers received a score of 2.5.

Table S3. Baseline characteristics of CRIC participants by tertile of HEI-2015 score<sup>a</sup>.

| Characteristics                  | Tertile of HEI-2015 score  |               |               | P <sup>c</sup> |
|----------------------------------|----------------------------|---------------|---------------|----------------|
|                                  | Tertile 1: 55 <sup>b</sup> | Tertile 2: 68 | Tertile 3: 79 |                |
| <i>n</i>                         | 801                        | 801           | 801           |                |
| Age, years                       | 55 ± 12                    | 58 ± 11       | 60 ± 10       | <0.001         |
| Female, %                        | 39                         | 47            | 57            | <0.001         |
| Non-white, %                     | 42                         | 52            | 47            | 0.001          |
| ≥College graduate, %             | 31                         | 37            | 50            | <0.001         |
| Income ≥\$50,000, %              | 34                         | 34            | 41            | 0.01           |
| Current smoker, %                | 21                         | 10            | 5             | <0.001         |
| Current drinker, %               | 22                         | 21            | 24            | 0.4            |
| Physical activity, METs/wk       | 201 ± 130                  | 207 ± 137     | 200 ± 125     | 0.9            |
| BMI, kg/m <sup>2</sup>           | 32 ± 8                     | 32 ± 8        | 31 ± 7        | 0.05           |
| Diabetes, %                      | 40                         | 46            | 43            | 0.1            |
| Hypertension, %                  | 85                         | 85            | 80            | 0.01           |
| Systolic BP, mmHg                | 126 ± 21                   | 126 ± 21      | 126 ± 21      | 0.8            |
| Diastolic BP, mmHg               | 72 ± 12                    | 71 ± 12       | 70 ± 12       | <0.001         |
| History of CVD, %                | 30                         | 33            | 30            | 0.5            |
| eGFR, mL/min/1.73 m <sup>2</sup> | 45 ± 17                    | 47 ± 17       | 48 ± 17       | <0.001         |
| Urinary protein, g/24 hr         | 1.1 ± 2.4                  | 1.0 ± 2.1     | 0.7 ± 1.6     | <0.001         |
| HDL cholesterol, mg/dL           | 46 ± 15                    | 48 ± 17       | 50 ± 15       | <0.001         |
| FGF23, RU/mL                     | 243 ± 471                  | 210 ± 386     | 189 ± 301     | 0.01           |
| ACEi or ARB use, %               | 66                         | 69            | 66            | 0.4            |
| Total energy intake, kcal/d      | 1,927 ± 864                | 1,836 ± 812   | 1,682 ± 670   | <0.001         |
| Protein intake, g/d              | 71 ± 36                    | 72 ± 36       | 68 ± 30       | 0.03           |
| Sodium intake, mg/d              | 2,999 ± 1,493              | 2,949 ± 1,428 | 2,656 ± 1,140 | <0.001         |
| Potassium intake, mg/d           | 2,748 ± 1,288              | 3,052 ± 1,386 | 3,224 ± 1,288 | <0.001         |
| Phosphorus intake, mg/d          | 1,136 ± 539                | 1,164 ± 539   | 1,140 ± 478   | 0.9            |
| Dietary acid load, mEq/d         | 2.9 ± 17                   | -3.3 ± 18     | -10.4 ± 14    | <0.001         |

<sup>a</sup> Values for categorical variables are given as percentage; for continuous variables, mean ± standard deviation. ACEi, angiotensin-converting enzyme inhibitor; ARB, angiotensin II receptor blocker; BMI, body mass index; BP, blood pressure; CRIC, Chronic Renal Insufficiency Cohort; CVD, cardiovascular disease; eGFR, estimated glomerular filtration rate; HDL, high-density lipoprotein; FGF23, fibroblast growth factor 23; HEI, Healthy Eating Index; kcal, kilocalories; mEq/d, milliequivalents per day; MET, metabolic equivalent task; mmHg, millimeters of mercury; RU/mL, reference units per milliliter.

<sup>b</sup> Median score of tertile.

<sup>c</sup> Categorical variables were analyzed using  $\chi^2$  test. Continuous variables were analyzed using ANOVA.

Table S4. Baseline characteristics of CRIC participants by tertile of AHEI-2010 score<sup>a</sup>.

| Characteristics                  | Tertile of AHEI-2010 score |               |               | P <sup>c</sup> |
|----------------------------------|----------------------------|---------------|---------------|----------------|
|                                  | Tertile 1: 34 <sup>b</sup> | Tertile 2: 46 | Tertile 3: 58 |                |
| <i>n</i>                         | 801                        | 801           | 801           |                |
| Age, years                       | 56 ± 12                    | 58 ± 11       | 59 ± 10       | <0.001         |
| Female, %                        | 43                         | 47            | 53            | <0.001         |
| Non-white, %                     | 51                         | 50            | 40            | <0.001         |
| ≥College graduate, %             | 29                         | 38            | 51            | <0.001         |
| Income ≥\$50,000, %              | 29                         | 36            | 44            | <0.001         |
| Current smoker, %                | 18                         | 12            | 6             | <0.001         |
| Current drinker, %               | 18                         | 21            | 28            | <0.001         |
| Physical activity, METs/wk       | 196 ± 130                  | 206 ± 137     | 205 ± 124     | 0.2            |
| BMI, kg/m <sup>2</sup>           | 32 ± 8                     | 32 ± 8        | 31 ± 8        | 0.03           |
| Diabetes, %                      | 38                         | 44            | 47            | 0.001          |
| Hypertension, %                  | 87                         | 84            | 80            | 0.002          |
| Systolic BP, mmHg                | 127 ± 21                   | 127 ± 21      | 125 ± 21      | 0.1            |
| Diastolic BP, mmHg               | 72 ± 12                    | 71 ± 12       | 70 ± 12       | <0.001         |
| History of CVD, %                | 31                         | 33            | 29            | 0.2            |
| eGFR, mL/min/1.73 m <sup>2</sup> | 44 ± 16                    | 47 ± 17       | 49 ± 18       | <0.001         |
| Urinary protein, g/24 hr         | 1.0 ± 2.3                  | 0.9 ± 2.2     | 0.8 ± 1.8     | 0.01           |
| HDL cholesterol, mg/dL           | 47 ± 15                    | 48 ± 16       | 50 ± 16       | <0.001         |
| FGF23, RU/mL                     | 256 ± 569                  | 200 ± 247     | 186 ± 274     | <0.001         |
| ACEi or ARB use, %               | 66                         | 69            | 67            | 0.3            |
| Total energy intake, kcal/d      | 1,681 ± 747                | 1,808 ± 795   | 1,957 ± 811   | <0.001         |
| Protein intake, g/d              | 60 ± 29                    | 70 ± 33       | 81 ± 38       | <0.001         |
| Sodium intake, mg/d              | 2,473 ± 1,175              | 2,887 ± 1,322 | 3,224 ± 1,486 | 0.001          |
| Potassium intake, mg/d           | 2,495 ± 1,088              | 2,985 ± 1,276 | 3,543 ± 1,412 | <0.001         |
| Phosphorus intake, mg/d          | 971 ± 441                  | 1,146 ± 506   | 1,323 ± 545   | <0.001         |
| Dietary acid load, mEq/d         | -1.3 ± 16                  | -2.8 ± 16     | -6.6 ± 19     | <0.001         |

<sup>a</sup> Values for categorical variables are given as percentage; for continuous variables, mean ± standard deviation. ACEi, angiotensin-converting enzyme inhibitor; AHEI, Alternative Healthy Eating Index; ARB, angiotensin II receptor blocker; BMI, body mass index; BP, blood pressure; CRIC, Chronic Renal Insufficiency Cohort; CVD, cardiovascular disease; eGFR, estimated glomerular filtration rate; FGF23, fibroblast growth factor 23; HDL, high-density lipoprotein; kcal, kilocalories; mEq/d, milliequivalents per day; MET, metabolic equivalent task; mmHg, millimeters of mercury; RU/mL, reference units per milliliter.

<sup>b</sup> Median score of tertile.

<sup>c</sup> Categorical variables were analyzed using  $\chi^2$  test. Continuous variables were analyzed using ANOVA.

Table S5. Baseline characteristics of CRIC participants by tertile of aMed score<sup>a</sup>.

| Characteristics                  | Tertile of aMed score     |               |                | P <sup>c</sup> |
|----------------------------------|---------------------------|---------------|----------------|----------------|
|                                  | Tertile 1: 2 <sup>b</sup> | Tertile 2: 4  | Tertile 3: 6.5 |                |
| <i>n</i>                         | 870                       | 851           | 682            |                |
| Age, years                       | 56 ± 12                   | 58 ± 11       | 60 ± 10        | <0.001         |
| Female, %                        | 48                        | 47            | 49             | 0.8            |
| Non-white, %                     | 45                        | 51            | 45             | 0.03           |
| ≥College graduate, %             | 30                        | 41            | 49             | <0.001         |
| Income ≥\$50,000, %              | 33                        | 35            | 43             | <0.001         |
| Current smoker, %                | 19                        | 11            | 5              | <0.001         |
| Current drinker, %               | 21                        | 20            | 28             | <0.001         |
| Physical activity, METs/wk       | 191 ± 127                 | 211 ± 136     | 207 ± 128      | 0.01           |
| BMI, kg/m <sup>2</sup>           | 32 ± 8                    | 32 ± 7        | 32 ± 8         | 0.3            |
| Diabetes, %                      | 41                        | 44            | 44             | 0.3            |
| Hypertension, %                  | 84                        | 84            | 82             | 0.5            |
| Systolic BP, mmHg                | 127 ± 21                  | 126 ± 21      | 126 ± 21       | 0.5            |
| Diastolic BP, mmHg               | 71 ± 12                   | 70 ± 12       | 71 ± 12        | 0.1            |
| History of CVD, %                | 31                        | 32            | 30             | 0.7            |
| eGFR, mL/min/1.73 m <sup>2</sup> | 45 ± 17                   | 47 ± 17       | 49 ± 18        | <0.001         |
| Urinary protein, g/24 hr         | 1.1 ± 2.4                 | 0.9 ± 2.0     | 0.7 ± 1.7      | <0.001         |
| HDL cholesterol, mg/dL           | 48 ± 15                   | 48 ± 16       | 50 ± 16        | 0.02           |
| FGF23, RU/mL                     | 257 ± 546                 | 199 ± 235     | 178 ± 298      | <0.001         |
| ACEi or ARB use, %               | 66                        | 69            | 67             | 0.4            |
| Total energy intake, kcal/d      | 1,655 ± 762               | 1,817 ± 775   | 2,017 ± 807    | <0.001         |
| Protein intake, g/d              | 61 ± 31                   | 70 ± 33       | 82 ± 37        | <0.001         |
| Sodium intake, mg/d              | 2,521 ± 1,237             | 2,897 ± 1,392 | 3,275 ± 1,388  | <0.001         |
| Potassium intake, mg/d           | 2,488 ± 1,126             | 3,025 ± 1,294 | 3,649 ± 1,351  | <0.001         |
| Phosphorus intake, mg/d          | 1,002 ± 480               | 1,141 ± 490   | 1,339 ± 543    | <0.001         |
| Dietary acid load, mEq/d         | 0.2 ± 16                  | -3.9 ± 17     | -8.0 ± 18      | <0.001         |

<sup>a</sup> Values for categorical variables are given as percentage; for continuous variables, mean ± standard deviation. ACEi, angiotensin-converting enzyme inhibitor; aMed, alternate Mediterranean diet; ARB, angiotensin II receptor blocker; BMI, body mass index; BP, blood pressure; CRIC, Chronic Renal Insufficiency Cohort; CVD, cardiovascular disease; eGFR, estimated glomerular filtration rate; FGF23, fibroblast growth factor 23; HDL, high-density lipoprotein; kcal, kilocalories; mEq/d, milliequivalents per day; MET, metabolic equivalent task; mmHg, millimeters of mercury; RU/mL, reference units per milliliter.

<sup>b</sup> Median score of tertile.

<sup>c</sup> Categorical variables were analyzed using  $\chi^2$  test. Continuous variables were analyzed using ANOVA.

Table S6. Baseline characteristics of CRIC participants by tertile of DASH score<sup>a</sup>.

| Characteristics                  | Tertile of DASH score      |               |               | P <sup>c</sup> |
|----------------------------------|----------------------------|---------------|---------------|----------------|
|                                  | Tertile 1: 19 <sup>b</sup> | Tertile 2: 24 | Tertile 3: 29 |                |
| <i>n</i>                         | 912                        | 696           | 795           |                |
| Age, years                       | 55 ± 12                    | 58 ± 10       | 60 ± 10       | <0.001         |
| Female, %                        | 37                         | 49            | 59            | <0.001         |
| Non-white, %                     | 54                         | 45            | 41            | <0.001         |
| ≥College graduate, %             | 30                         | 41            | 49            | <0.001         |
| Income ≥\$50,000, %              | 33                         | 37            | 40            | 0.01           |
| Current smoker, %                | 21                         | 9             | 5             | <0.001         |
| Current drinker, %               | 24                         | 24            | 19            | 0.04           |
| Physical activity, METs/wk       | 204 ± 135                  | 205 ± 139     | 198 ± 118     | 0.3            |
| BMI, kg/m <sup>2</sup>           | 32 ± 8                     | 32 ± 8        | 32 ± 8        | 0.5            |
| Diabetes, %                      | 37                         | 44            | 49            | <0.001         |
| Hypertension, %                  | 87                         | 85            | 79            | <0.001         |
| Systolic BP, mmHg                | 127 ± 21                   | 126 ± 21      | 125 ± 21      | 0.2            |
| Diastolic BP, mmHg               | 73 ± 13                    | 70 ± 12       | 69 ± 11       | <0.001         |
| History of CVD, %                | 30                         | 33            | 30            | 0.3            |
| eGFR, mL/min/1.73 m <sup>2</sup> | 45 ± 17                    | 47 ± 17       | 48 ± 17       | 0.002          |
| Urinary protein, g/24 hr         | 1.1 ± 2.3                  | 1.0 ± 2.4     | 0.6 ± 1.4     | <0.001         |
| HDL cholesterol, mg/dL           | 46 ± 15                    | 48 ± 15       | 51 ± 17       | <0.001         |
| FGF23, RU/mL                     | 246 ± 541                  | 201 ± 225     | 189 ± 292     | 0.003          |
| ACEi or ARB use, %               | 67                         | 71            | 64            | 0.02           |
| Total energy intake, kcal/d      | 1,905 ± 836                | 1,782 ± 794   | 1,741 ± 728   | <0.001         |
| Protein intake, g/d              | 70 ± 35                    | 71 ± 36       | 70 ± 33       | 0.8            |
| Sodium intake, mg/d              | 2,922 ± 1,415              | 2,889 ± 1,419 | 2,788 ± 1,268 | 0.05           |
| Potassium intake, mg/d           | 2,723 ± 1,240              | 3,034 ± 1,403 | 3,311 ± 1,313 | <0.001         |
| Phosphorus intake, mg/d          | 1,094 ± 505                | 1,157 ± 531   | 1,199 ± 520   | <0.001         |
| Dietary acid load, mEq/d         | 2.0 ± 17                   | -3.5 ± 17     | -10.1 ± 15    | <0.001         |

<sup>a</sup> Values for categorical variables are given as percentage; for continuous variables, mean ± standard deviation. ACEi, angiotensin-converting enzyme inhibitor; ARB, angiotensin II receptor blocker; BMI, body mass index; blood pressure; CRIC, Chronic Renal Insufficiency Cohort; CVD, cardiovascular disease; DASH, Dietary Approaches to Stop Hypertension; eGFR, estimated glomerular filtration rate; FGF23, fibroblast growth factor 23; HDL, high-density lipoprotein; kcal, kilocalories; mEq/d, milliequivalents per day; MET, metabolic equivalent task, mmHg, millimeters of mercury; RU/mL, reference units per milliliter.

<sup>b</sup> Median score of tertile.

<sup>c</sup> Categorical variables were analyzed using  $\chi^2$  test. Continuous variables were analyzed using ANOVA.



Table S7. Correlation coefficients between dietary scores.

|           | HEI-2015 | AHEI-2010 | aMed | DASH |
|-----------|----------|-----------|------|------|
| HEI-2015  |          |           |      |      |
| AHEI-2010 | 0.63     |           |      |      |
| aMed      | 0.71     | 0.76      |      |      |
| DASH      | 0.80     | 0.77      | 0.69 |      |

AHEI, Alternative Healthy Eating Index; aMed, alternate Mediterranean diet; DASH, Dietary Approaches to Stop Hypertension; HEI, Healthy Eating Index

Table S8. Hazard ratios of covariates in Model 3 for aMed and CKD progression and all-cause mortality.

| <b>Covariate</b>                 | <b>CKD progression</b> | <b>All-cause mortality</b> | <b>Composite</b> |
|----------------------------------|------------------------|----------------------------|------------------|
| aMed score (ref: Tertile 1)      |                        |                            |                  |
| Tertile 2                        | 1.10 (0.94-1.29)       | 0.85 (0.72-1.01)           | 1.00 (0.87-1.15) |
| Tertile 3                        | 0.75 (0.62-0.90)       | 0.69 (0.57-0.84)           | 0.77 (0.66-0.89) |
| Total energy intake, kcal/d      | 1.00 (1.00-1.00)       | 1.00 (1.00-1.00)           | 1.00 (1.00-1.00) |
| Clinical site                    | 1.00 (1.00-1.00)       | 1.00 (1.00-1.00)           | 1.00 (1.00-1.00) |
| Age, years                       | 0.98 (0.97-0.99)       | 1.05 (1.04-1.06)           | 1.00 (0.99-1.00) |
| Female                           | 0.72 (0.61-0.85)       | 0.69 (0.58-0.82)           | 0.66 (0.58-0.76) |
| Race (ref: white)                |                        |                            |                  |
| Black                            | 1.86 (1.57-2.20)       | 0.96 (0.80-1.14)           | 1.47 (1.28-1.68) |
| Other                            | 1.53 (1.18-1.97)       | 0.66 (0.48-0.91)           | 1.40 (1.13-1.73) |
| Education (ref: <High school)    |                        |                            |                  |
| High school graduate             | 1.30 (1.01-1.66)       | 1.12 (0.89-1.41)           | 1.10 (0.90-1.35) |
| Some college                     | 1.13 (0.90-1.43)       | 1.02 (0.82-1.28)           | 1.10 (0.91-1.33) |
| College graduate or higher       | 1.12 (0.87-1.44)       | 0.84 (0.65-1.08)           | 1.02 (0.83-1.26) |
| Income (ref: ≤\$20,000)          |                        |                            |                  |
| \$20,001-\$50,000                | 0.94 (0.76-1.16)       | 0.79 (0.65-0.97)           | 0.95 (0.80-1.12) |
| \$50,001-\$100,000               | 1.25 (0.99-1.57)       | 0.67 (0.52-0.86)           | 0.97 (0.80-1.18) |
| >\$100,000                       | 0.95 (0.69-1.31)       | 0.50 (0.35-0.71)           | 0.74 (0.57-0.96) |
| "Don't wish to answer"           | 1.15 (0.92-1.45)       | 0.80 (0.63-1.00)           | 1.01 (0.84-1.22) |
| eGFR, mL/min/1.73 m <sup>2</sup> | 0.94 (0.94-0.95)       | 0.97 (0.97-0.98)           | 0.95 (0.95-0.96) |
| Urinary protein, g/24 hr         | 1.23 (1.21-1.26)       | 1.07 (1.04-1.10)           | 1.20 (1.18-1.23) |
| Current smoker                   | 0.95 (0.78-1.17)       | 1.66 (1.36-2.02)           | 1.13 (0.95-1.33) |
| Physical activity, METs/wk       | 1.00 (1.00-1.00)       | 1.00 (1.00-1.00)           | 1.00 (1.00-1.00) |
| BMI, kg/m <sup>2</sup>           | 0.98 (0.97-0.99)       | 0.99 (0.98-1.00)           | 0.99 (0.98-0.99) |
| Diabetes                         | 1.98 (1.70-2.31)       | 1.52 (1.29-1.78)           | 1.65 (1.45-1.88) |
| Hypertension                     | 1.35 (1.04-1.75)       | 1.19 (0.90-1.56)           | 1.25 (1.01-1.54) |
| HDL cholesterol, mg/dL           | 1.00 (1.00-1.01)       | 1.00 (0.99-1.00)           | 1.00 (1.00-1.01) |
| ACEi or ARB use                  | 0.92 (0.78-1.08)       | 0.95 (0.80-1.13)           | 0.93 (0.81-1.07) |
| History of CVD                   | 1.13 (0.97-1.32)       | 1.85 (1.59-2.16)           | 1.32 (1.17-1.50) |

ACEi, angiotensin-converting enzyme inhibitor; aMed, alternate Mediterranean diet; ARB, angiotensin II receptor blocker; BMI, body mass index; blood pressure; CRIC, Chronic Renal Insufficiency Cohort; CVD, cardiovascular disease; eGFR, estimated glomerular filtration rate; HDL, high-density lipoprotein; kcal, kilocalories; mEq/d, milliequivalents per day; MET, metabolic equivalent task, mmHg, millimeters of mercury; ref; reference.

Table S9. Hazard ratios of CKD progression adjusting for C-reactive protein, fibroblast growth factor-23, serum bicarbonate, blood urea nitrogen, and uric acid levels<sup>a</sup>.

|                               | Tertile 1 | Tertile 2        | Tertile 3        | P <sup>b</sup> |
|-------------------------------|-----------|------------------|------------------|----------------|
| <b>HEI-2015</b>               |           |                  |                  |                |
| Model 1                       | 1 (ref.)  | 1.00 (0.85-1.18) | 0.91 (0.77-1.09) | 0.3            |
| Model 1 + CRP                 | 1 (ref.)  | 1.00 (0.85-1.18) | 0.92 (0.77-1.09) | 0.4            |
| Model 1 + FGF-23              | 1 (ref.)  | 1.01 (0.85-1.19) | 0.93 (0.78-1.11) | 0.4            |
| Model 1 + serum bicarbonate   | 1 (ref.)  | 1.01 (0.85-1.19) | 0.93 (0.78-1.11) | 0.4            |
| Model 1 + blood urea nitrogen | 1 (ref.)  | 1.01 (0.85-1.19) | 0.92 (0.77-1.10) | 0.4            |
| Model 1 + uric acid           | 1 (ref.)  | 1.02 (0.86-1.21) | 0.93 (0.78-1.11) | 0.4            |
| <b>AHEI-2010</b>              |           |                  |                  |                |
| Model 1                       | 1 (ref.)  | 1.01 (0.85-1.19) | 0.83 (0.69-0.99) | 0.04           |
| Model 1 + CRP                 | 1 (ref.)  | 1.00 (0.84-1.18) | 0.83 (0.69-0.99) | 0.04           |
| Model 1 + FGF-23              | 1 (ref.)  | 1.03 (0.87-1.21) | 0.85 (0.71-1.02) | 0.09           |
| Model 1 + serum bicarbonate   | 1 (ref.)  | 1.00 (0.85-1.18) | 0.83 (0.69-0.99) | 0.04           |
| Model 1 + blood urea nitrogen | 1 (ref.)  | 1.00 (0.85-1.18) | 0.82 (0.68-0.98) | 0.03           |
| Model 1 + uric acid           | 1 (ref.)  | 1.00 (0.84-1.18) | 0.82 (0.68-0.98) | 0.03           |
| <b>aMed</b>                   |           |                  |                  |                |
| Model 1                       | 1 (ref.)  | 1.10 (0.94-1.29) | 0.75 (0.62-0.90) | 0.002          |
| Model 1 + CRP                 | 1 (ref.)  | 1.11 (0.94-1.30) | 0.75 (0.62-0.90) | 0.002          |
| Model 1 + FGF-23              | 1 (ref.)  | 1.12 (0.95-1.32) | 0.76 (0.63-0.91) | 0.004          |
| Model 1 + serum bicarbonate   | 1 (ref.)  | 1.10 (0.94-1.29) | 0.75 (0.62-0.91) | 0.003          |
| Model 1 + blood urea nitrogen | 1 (ref.)  | 1.11 (0.94-1.30) | 0.75 (0.62-0.90) | 0.003          |
| Model 1 + uric acid           | 1 (ref.)  | 1.09 (0.93-1.29) | 0.74 (0.61-0.89) | 0.002          |
| <b>DASH</b>                   |           |                  |                  |                |
| Model 1                       | 1 (ref.)  | 0.92 (0.78-1.09) | 0.83 (0.69-0.99) | 0.04           |
| Model 1 + CRP                 | 1 (ref.)  | 0.92 (0.78-1.09) | 0.83 (0.70-1.00) | 0.04           |
| Model 1 + FGF-23              | 1 (ref.)  | 0.94 (0.79-1.12) | 0.85 (0.71-1.02) | 0.1            |
| Model 1 + serum bicarbonate   | 1 (ref.)  | 0.92 (0.78-1.09) | 0.83 (0.69-0.99) | 0.04           |
| Model 1 + blood urea nitrogen | 1 (ref.)  | 0.92 (0.78-1.10) | 0.82 (0.69-0.99) | 0.04           |
| Model 1 + uric acid           | 1 (ref.)  | 0.94 (0.79-1.11) | 0.84 (0.70-1.00) | 0.1            |

<sup>a</sup> Cox proportional hazards models to estimate hazard ratios and 95% confidence intervals. Model 1 was adjusted for total energy intake, clinical site, age, sex, race, education, income level, estimated glomerular filtration rate, urinary protein, smoking status, physical activity, and alcohol status (for HEI-2015 and DASH scores), body mass index, diabetes mellitus, hypertension, cardiovascular disease, high-density lipoprotein cholesterol, and angiotensin-converting enzyme inhibitor or angiotensin II receptor blocker use. AHEI, Alternative Healthy Eating Index; aMed, alternate Mediterranean diet; CRP, C-reactive protein; DASH, Dietary Approaches to Stop Hypertension; FGF-23; fibroblast growth factor-23; HEI; Healthy Eating Index; ref, reference.

<sup>b</sup> P refers to p-value for a test of linear trend. Trend was tested using the median value within each tertile
